# Supplementary material for: Impact of the pandemic and concomitant COVID-19 on the management and outcomes of middle cerebral artery strokes: a nationwide registry-based study
Source: PubMed Central journal article supplement (PMC10900352; doi:10.1136/bmjopen-2023-080738), 2024-02-27

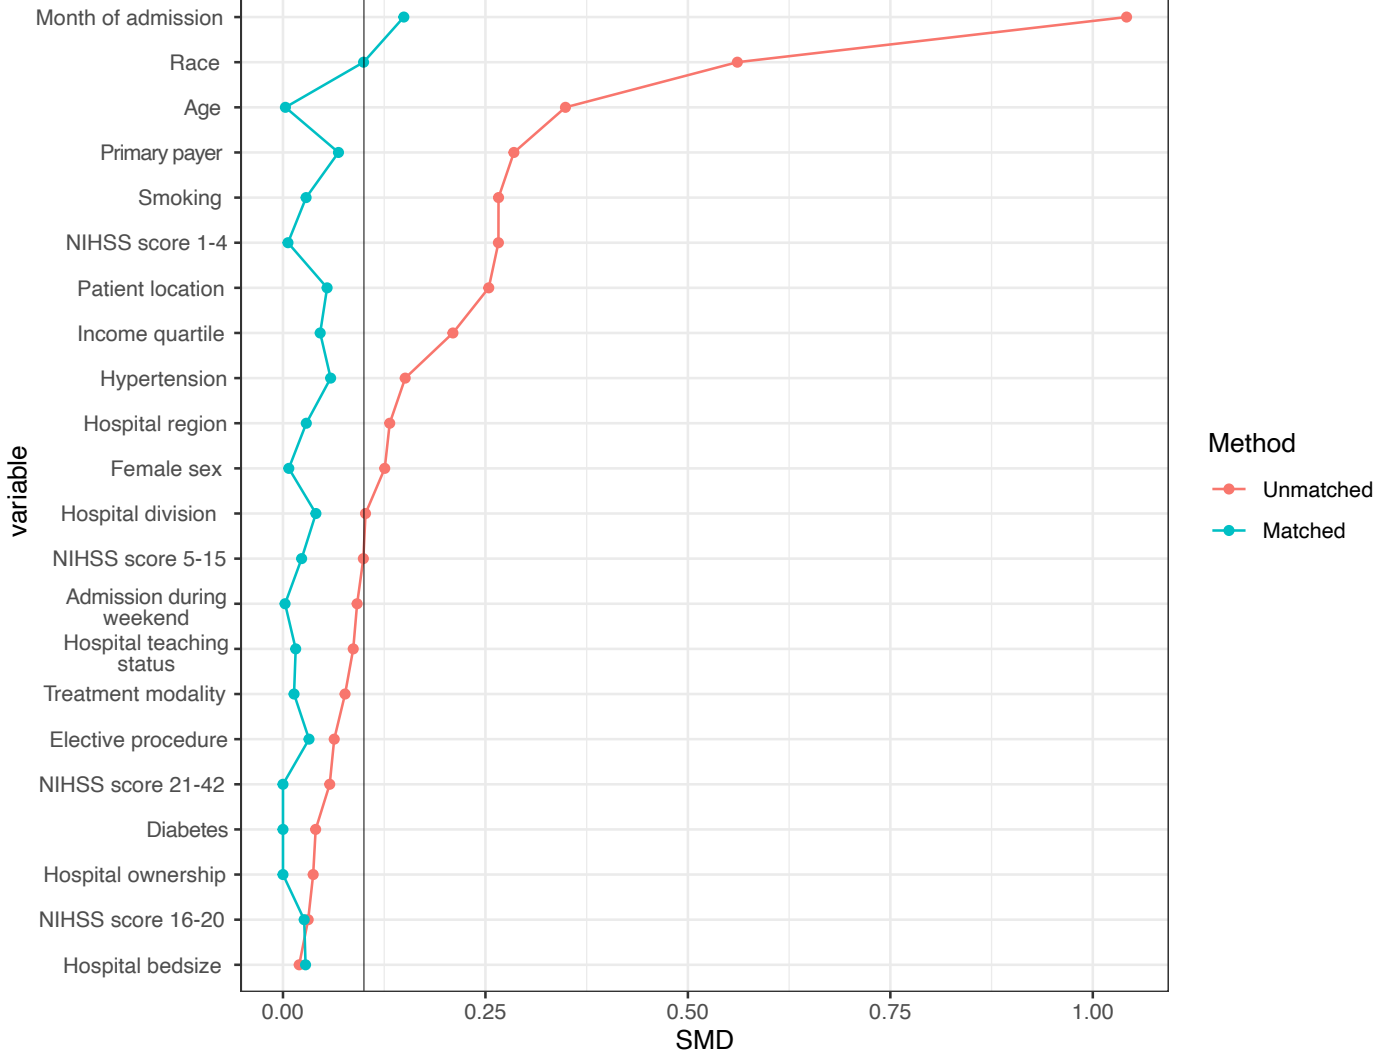

Supplement: bmjopen-2023-080738supp001.pdf [file bmjopen-2023-080738supp001.pdf]
